# Supplementary material
Source: publisher figshare collection journal article supplement (https://tandf.figshare.com/ndownloader/files/17148428)
Supplement: Supplementary file 1 [file 17148428]

## New naphthoquinone derivatives from *Fusarium napiforme* of a mangrove plant

Unang Supratman<sup>a\*</sup>, Nami Hirai<sup>b</sup>, Shiho Sato<sup>b</sup>, Keiko Watanabe<sup>b</sup>, Abdul Malik<sup>c</sup>, Suwardi Annas<sup>c</sup>, Desi Harneti<sup>a</sup>, Rani Maharani<sup>a</sup>, Takuya Koseki<sup>b</sup>, Yoshihito Shiono<sup>b\*</sup>

<sup>a</sup>Department of Chemistry, Faculty of Mathematics and Natural Sciences, Universitas Padjadjaran, Sumedang, 45363, Indonesia

<sup>b</sup>Department of Food, Life, and Environmental Science, Faculty of Agriculture, Yamagata University, Tsuruoka, Yamagata 997-8555, Japan

<sup>c</sup>Department of Geography, Faculty of Mathematics and Natural Sciences Universitas Negeri Makassar, Makassar, 90224, Indonesia

*Correspondence to: Yoshihito Shiono, Department of Food, Life, and Environmental Science, Faculty of Agriculture, Yamagata University, Tsuruoka, Yamagata 997-8555, Japan*  
*E-mail: yshiono@tds1.tr.yamagata-u.ac.jp*

**ABSTRACT:** Two new naphthoquinone derivatives, 8-hydroxy-astropaquinone B (**1**) and astropaquinone D (**2**) was isolated from *Fusarium napiforme*, endophyte fungus isolated from a mangrove plant, *Rhizophora mucronata* together with a known compound, 3-*O*-methyl-9-*O*-methylfusarubin (**3**). The structures of **1** and **2** were determined by spectroscopic methods, mainly by 2D NMR spectroscopic analyses. Compounds **1**, **2** and **3** exhibited antimicrobial activities and phytotoxicities.

**Keywords:** Endophyte; naphthoquinone; *Fusarium napiforme*; astropaquinone; antimicrobial activity, phytotoxicity.

## **List of supporting information**

## **Experimental**

### ***3.1. General experimental procedures***

Optical rotations were measured with a Horiba SEPA-300 polarimeter, and UV and IR spectra were recorded with Shimadzu UV-1800 and Jasco J-20A (JASCO Co., Tokyo, Japan) spectrophotometers, respectively. Mass spectra were obtained with a Synapt G2. NMR spectra were recorded on a JEOL ECZ-600 at 600 MHz for  $^1\text{H}$  and 150 MHz for  $^{13}\text{C}$ . Chemical shifts are given on a  $\delta$  (ppm) scale with TMS as an internal standard.  $^1\text{H}$ ,  $^{13}\text{C}$ , COSY, HMQC and HMBC spectra were recorded using JEOL standard pulse sequences. Column chromatography was conducted on silica gel 60. TLC was carried out on Merck precoated silica gel 60 F<sub>254</sub> plates.

### ***3.2 Fungal material and fermentation***

The fungal strain of IP-28 was isolated from a surface sterilized branch of *Rhizophora mucronata*, collected in a cost in Takalar Regency, South Sulawesi Province, Indonesia (southern latitude: 5°36'27.65"; east longitude: 119°28'22.12"). Fungal strains IP-28 was identified as *Fusarium napiforme* by the using a DNA analysis of the 18S rDNA regions. They have been deposited at our laboratory in the Faculty of Agriculture of Yamagata. IP-28 strain was cultured on slants with PDA at 28 °C for 5 days. Fermentation was carried out in

Erlenmeyer flasks (1000 mL) containing 50 g of rice and water (70 mL per flask; total of 2000 g). After autoclaving, each flask was inoculated with hyphae inoculum and incubated at 25 °C for one month. The mycelia and solid rice medium were extracted with MeOH and then was concentrated under reduced pressure to give a crude extract (6.0 g).

**Figure S1.**  $^1\text{H}$ - $^1\text{H}$  COSY, HMBC and NOE correlations for **1** and **2**.

**Figure S2.** Key NOE correlation for **1**.

**Figure S3.** The  $^1\text{H}$ -NMR spectrum of **1** (600 MHz,  $\text{CDCl}_3$ ).

**Figure S4.** The  $^{13}\text{C}$ -NMR spectrum of **1** (150 MHz,  $\text{CDCl}_3$ ).

**Figure S5.** The  $^1\text{H}$ - $^1\text{H}$  COSY spectrum of **1** (600 MHz,  $\text{CDCl}_3$ ).

**Figure S6.** The HMQC spectrum of **1** (600 MHz,  $\text{CDCl}_3$ ).

**Figure S7.** The HMBC spectrum of **1** (600 MHz,  $\text{CDCl}_3$ ).

**Figure S8.** The NOE spectrum of **1** (600 MHz,  $\text{CDCl}_3$ ).

**Figure S9.** The NOE spectrum of **1** (600 MHz,  $\text{CDCl}_3$ ).

**Figure S10.** The  $^1\text{H}$ -NMR spectrum of **2** (600 MHz,  $\text{CD}_3\text{OD}$ ).

**Figure S11.** The  $^{13}\text{C}$ -NMR spectrum of **2** (150 MHz,  $\text{CD}_3\text{OD}$ ).

**Figure S12.** The  $^1\text{H}$ - $^1\text{H}$  COSY spectrum of **2** (600 MHz,  $\text{CDCl}_3$ ).

**Figure S13.** The HMQC spectrum of **2** (600 MHz,  $\text{CD}_3\text{OD}$ ).

**Figure S14.** The HMBC spectrum of **2** (600 MHz,  $\text{CD}_3\text{OD}$ ).

**Figure S15.** The NOE spectrum of **1** (600 MHz,  $\text{CDCl}_3$ ).

**Figure S.16.** Effect of compounds **1**, **2** and **3** on the Growth of Lettuce Seedlings.

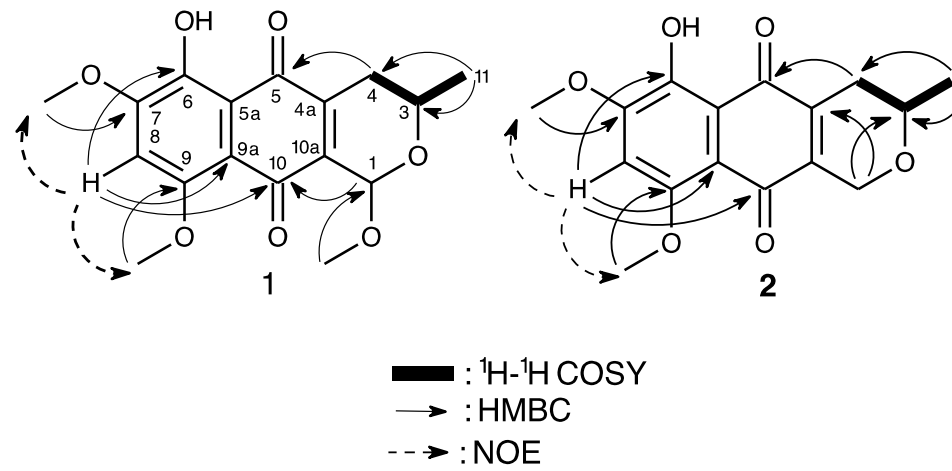

Figure S1.  $^1\text{H}$ - $^1\text{H}$  COSY, HMBC and NOE correlations for **1** and **2**.

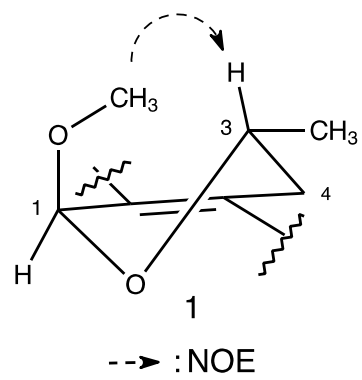

Figure S2. Key NOE correlation for **1**.

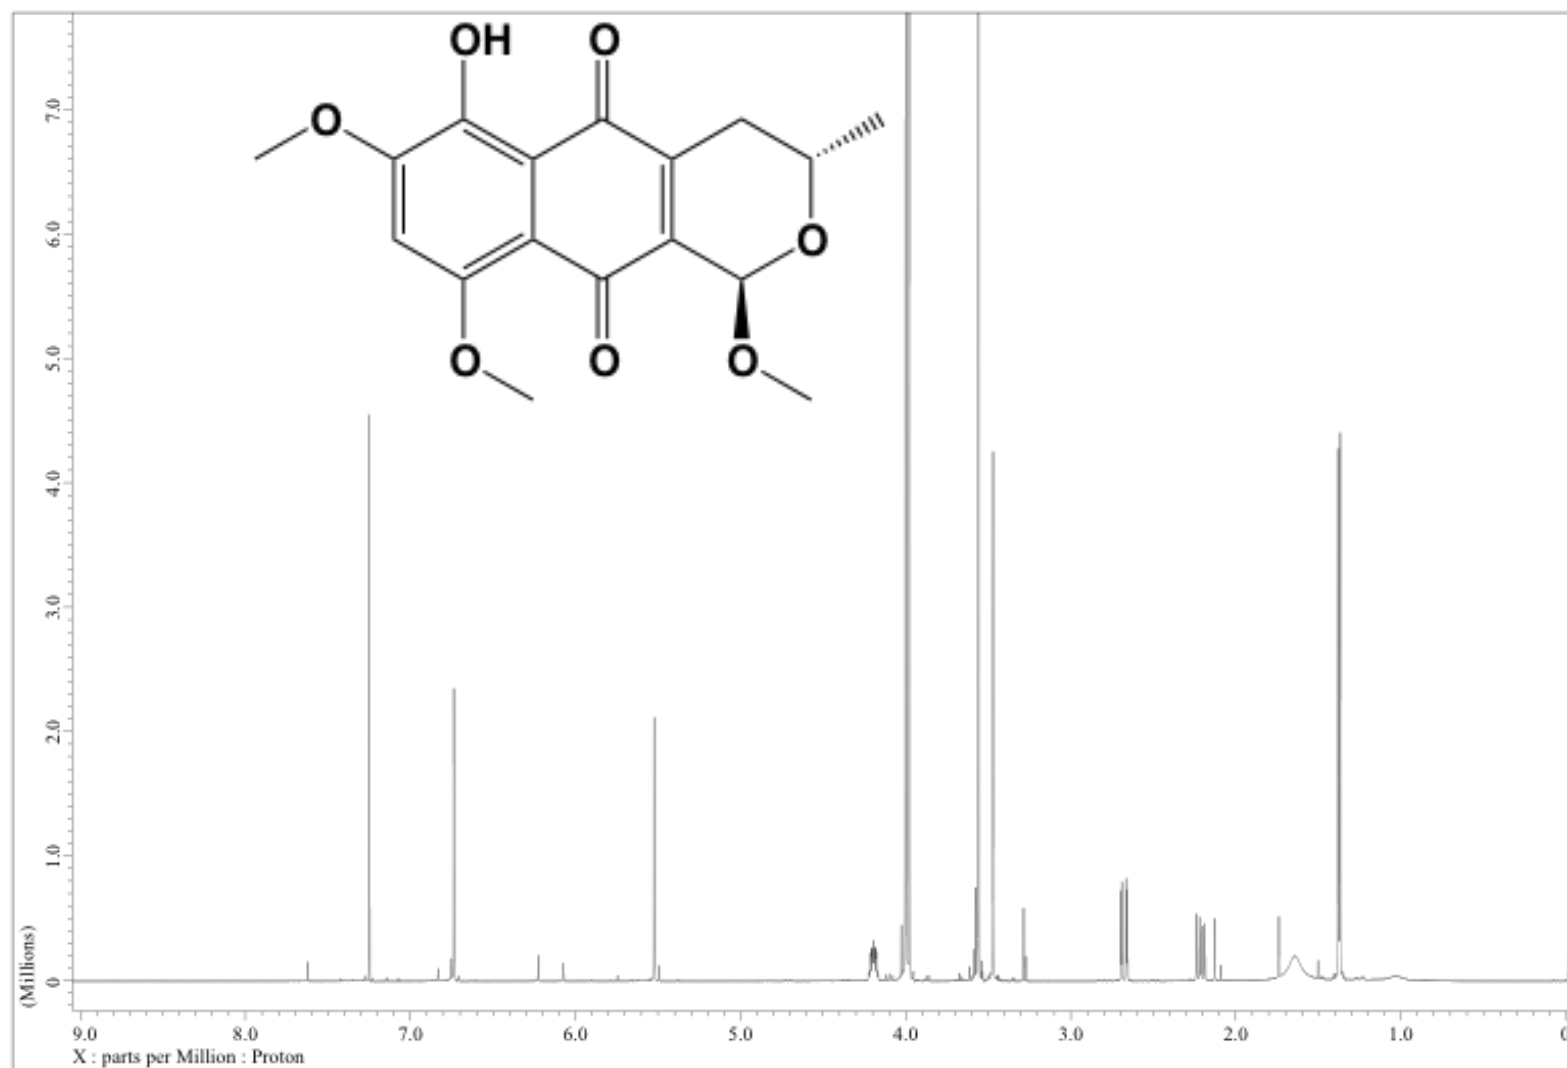

**Figure S3.** The  $^1\text{H-NMR}$  spectrum of **1** (600 MHz,  $\text{CDCl}_3$ ).

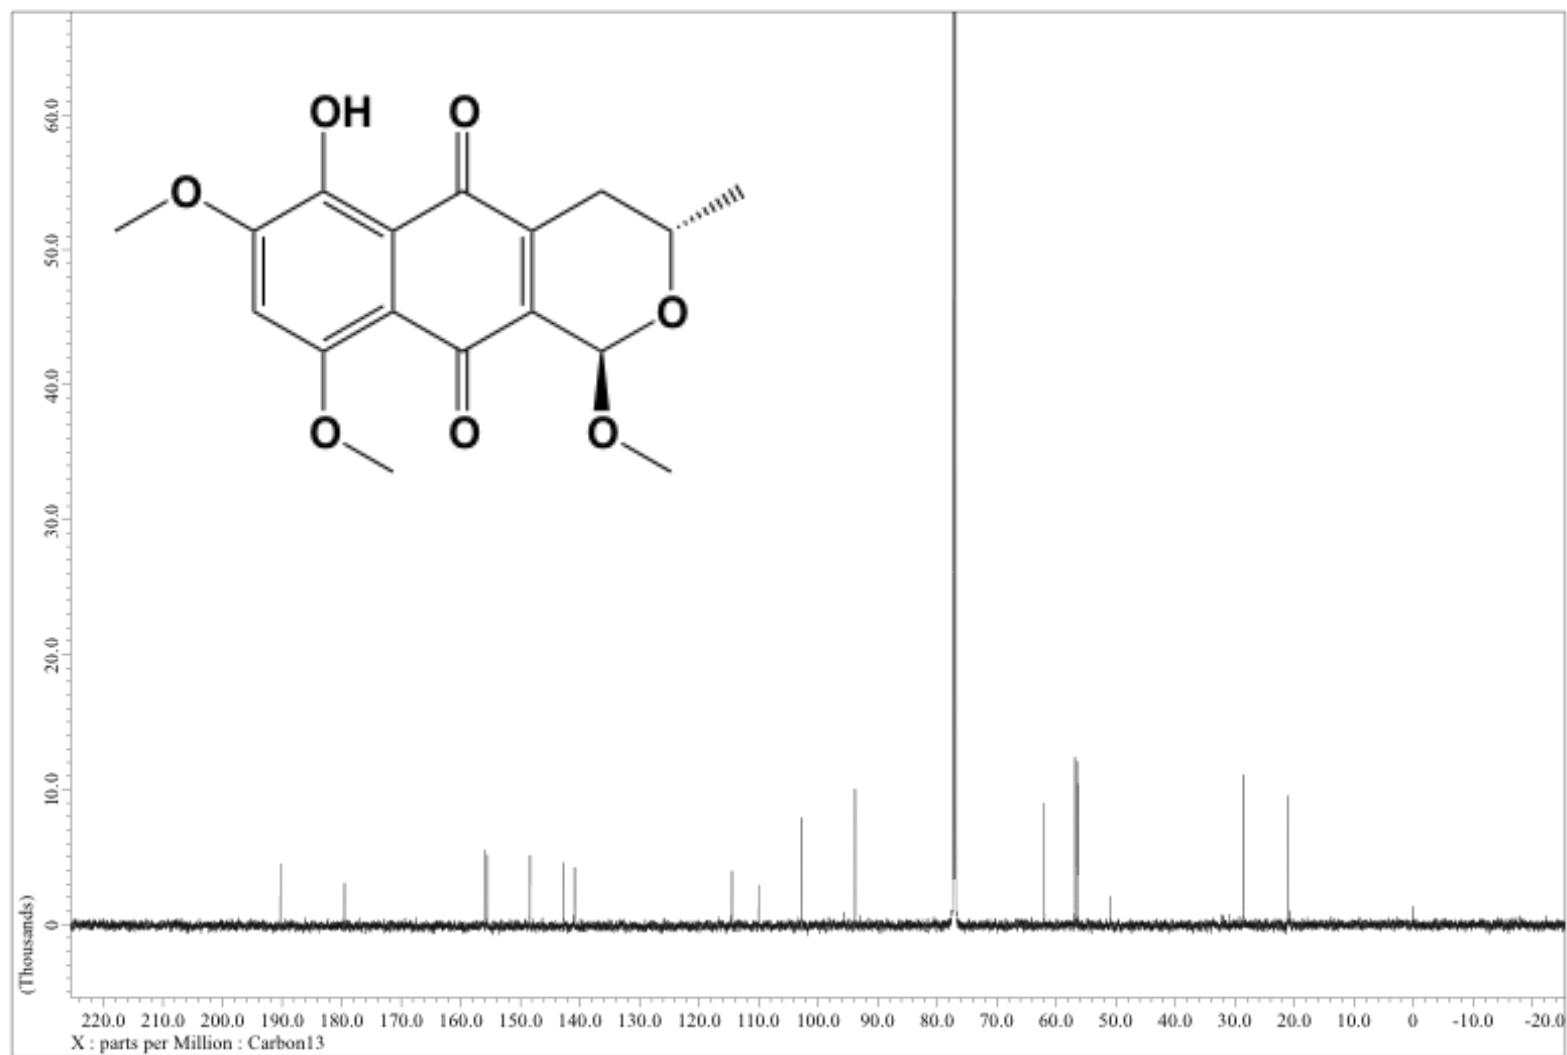

Figure S4. The  $^{13}\text{C}$ -NMR spectrum of **1** (150 MHz,  $\text{CDCl}_3$ ).

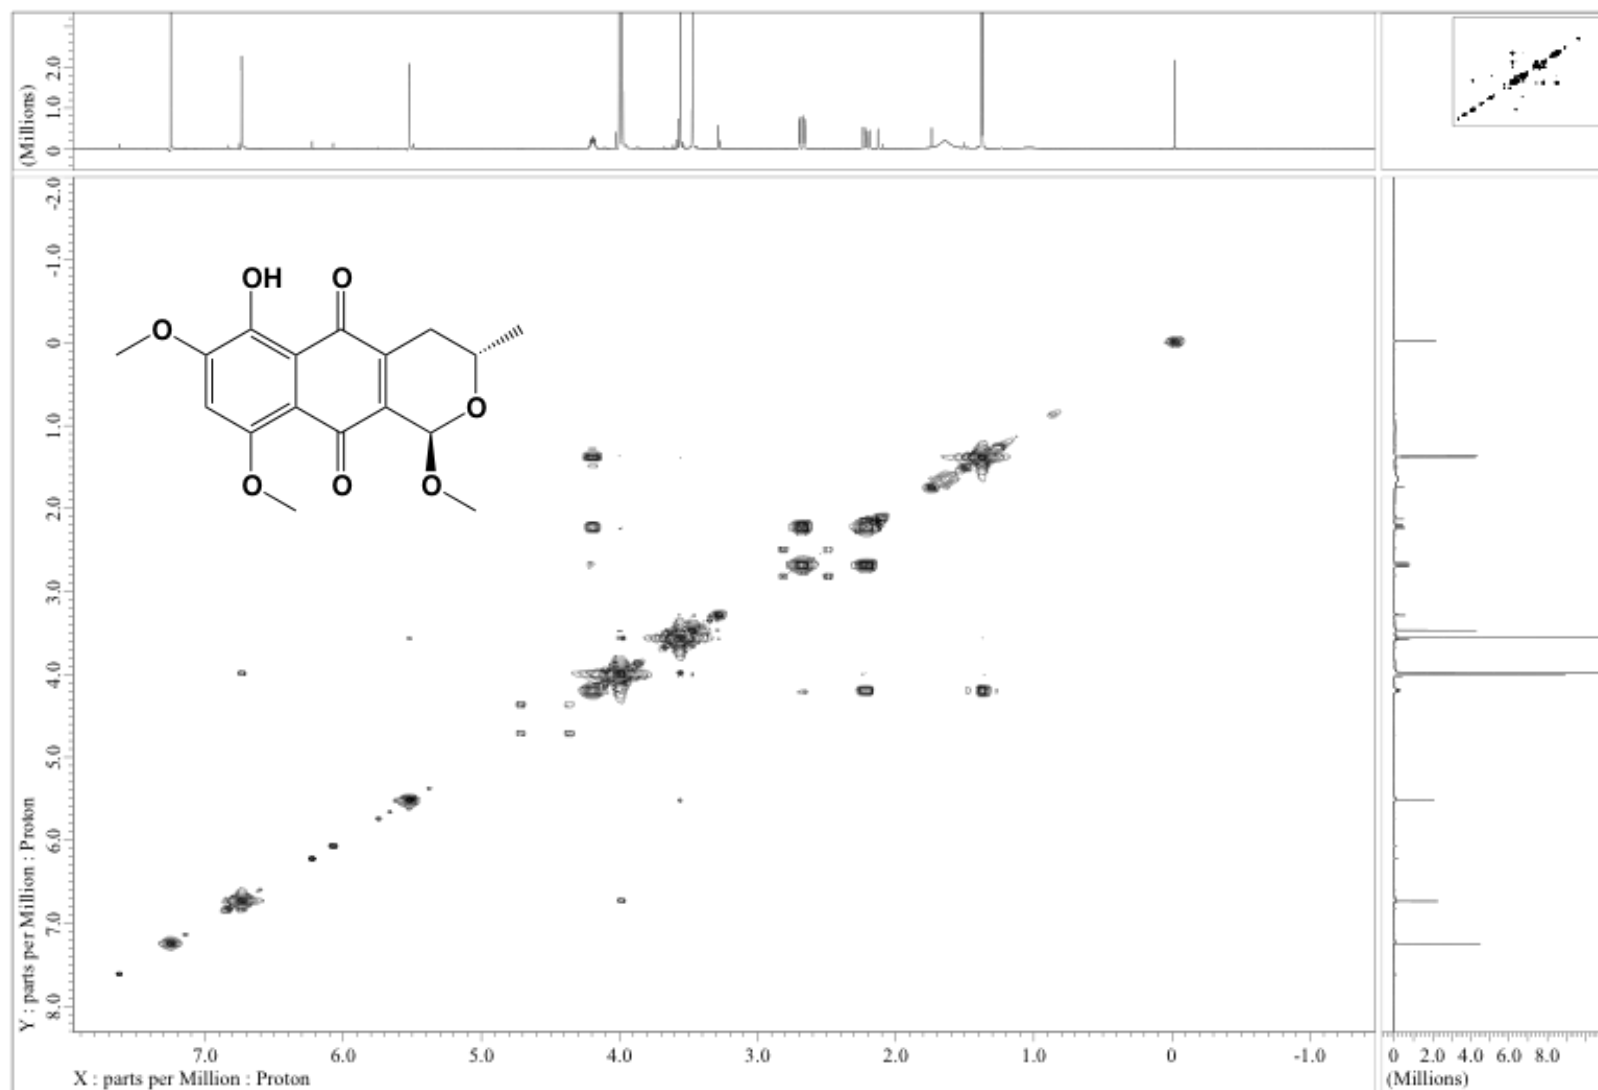

Figure S5. The  $^1\text{H}$ - $^1\text{H}$  COSY spectrum of **1** (600 MHz,  $\text{CDCl}_3$ ).



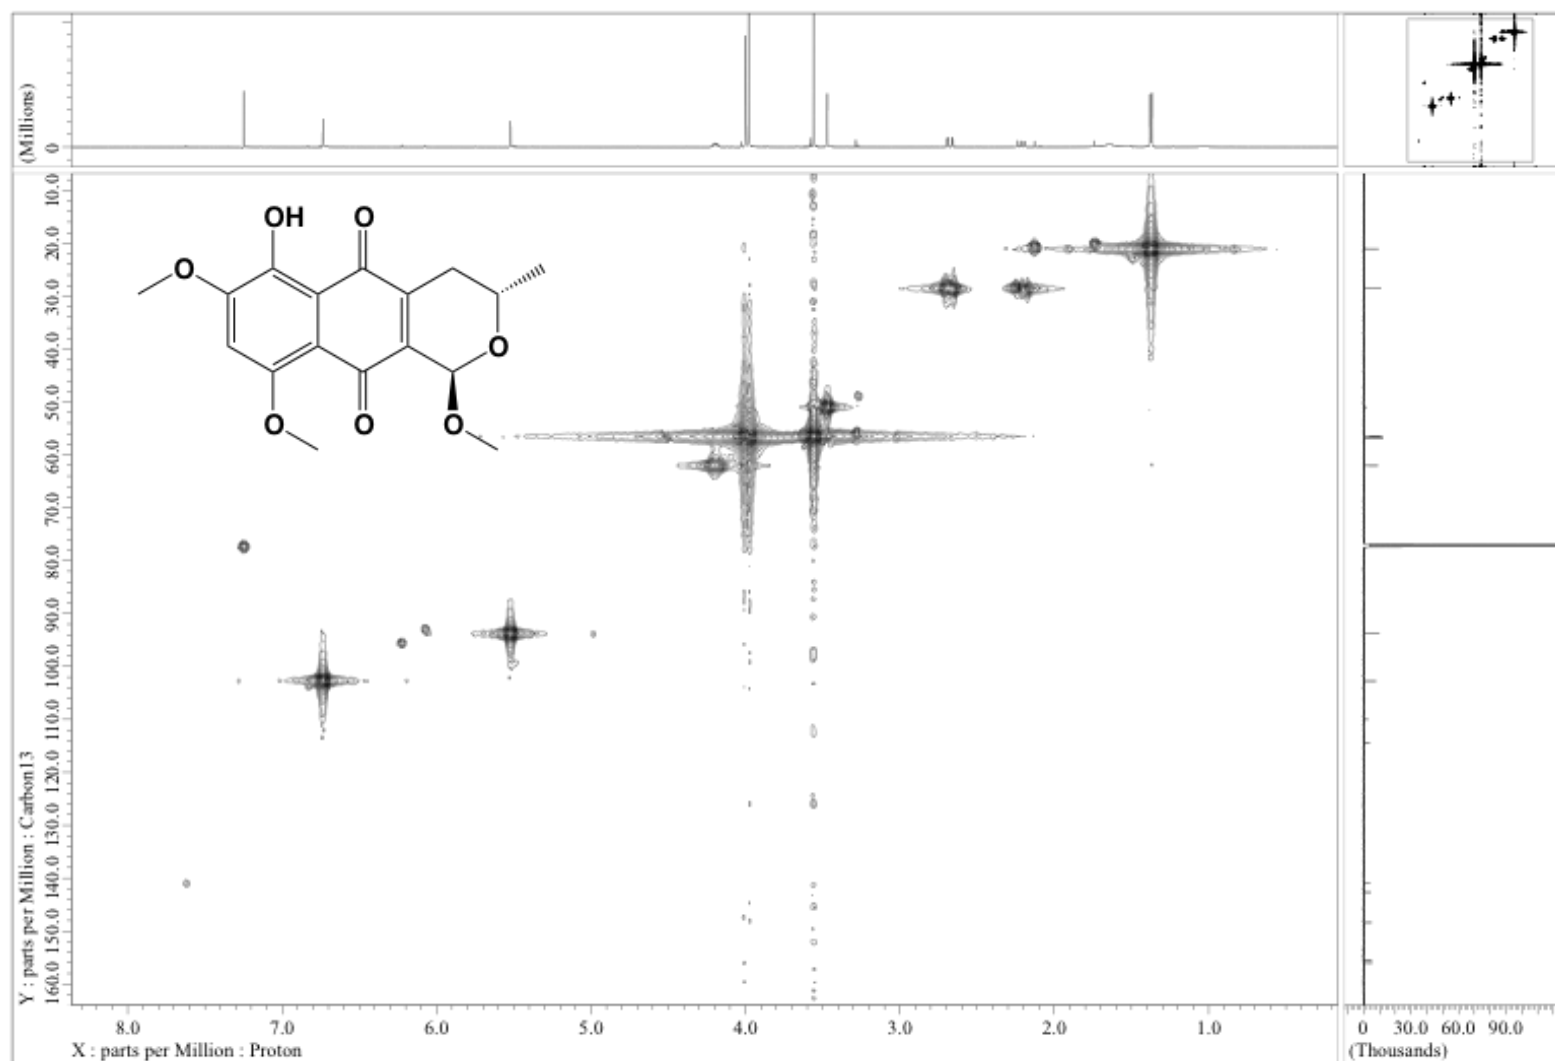

Figure S6. The HMQC spectrum of **1** (600 MHz, CDCl<sub>3</sub>).

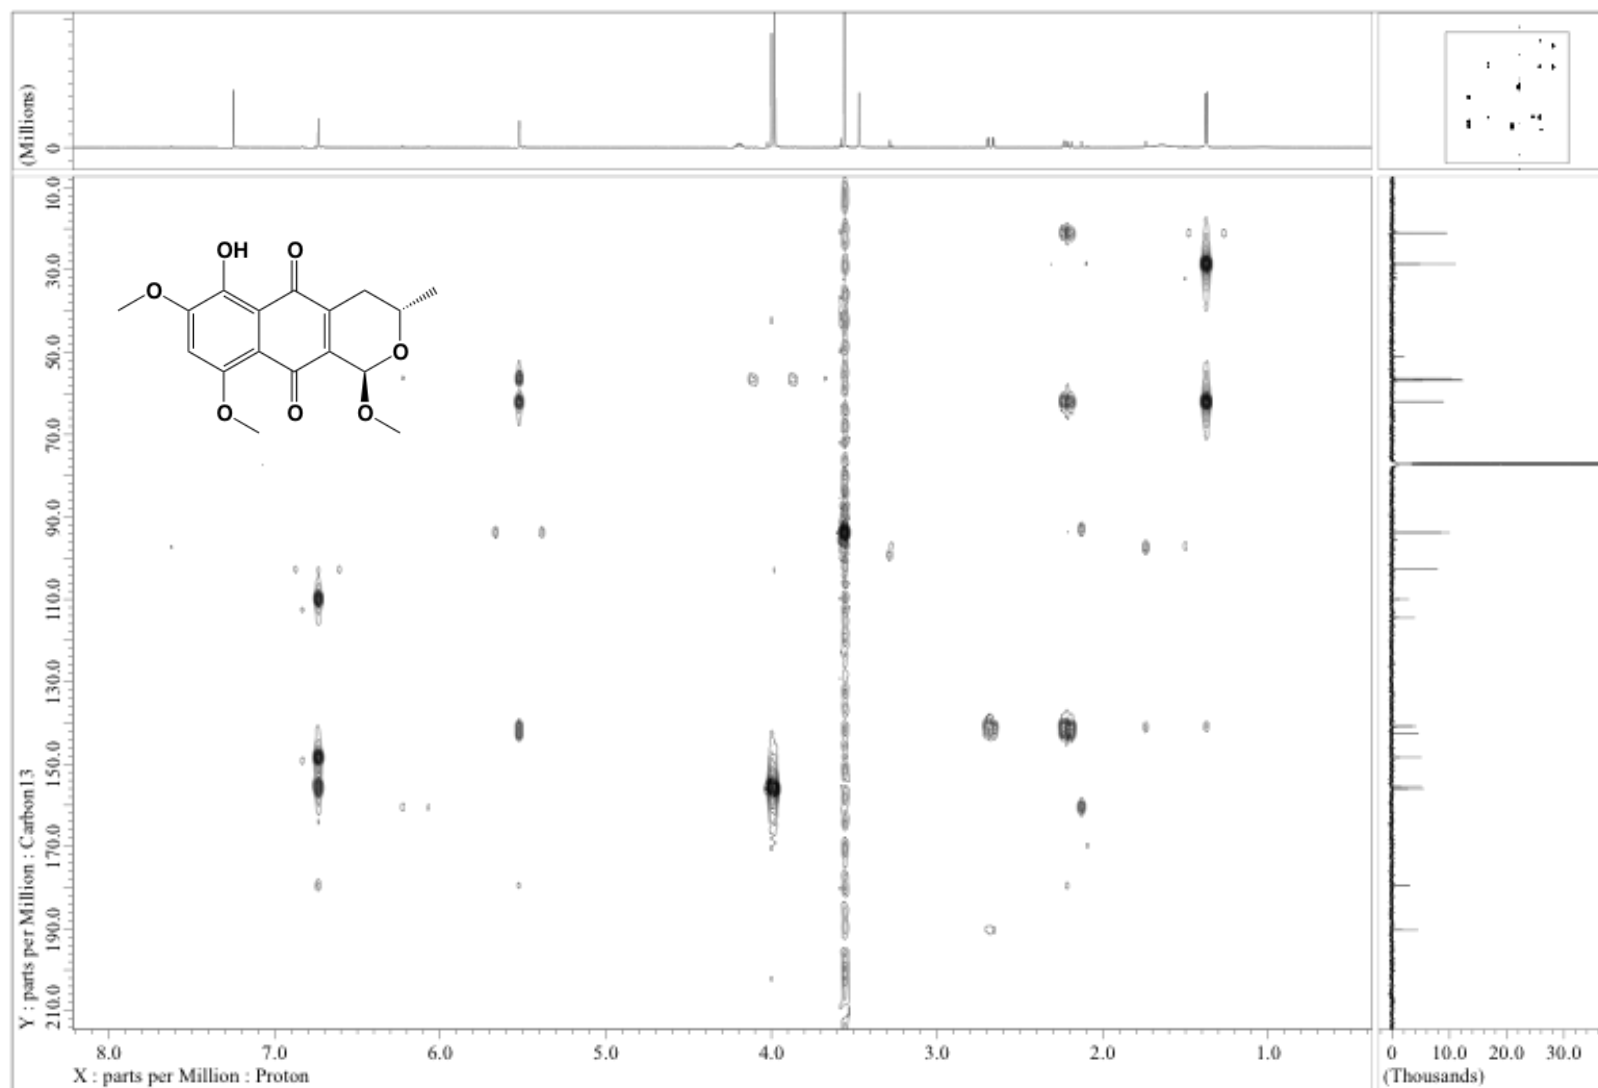

Figure S7. The HMBC spectrum of 1 (600 MHz, CDCl<sub>3</sub>).

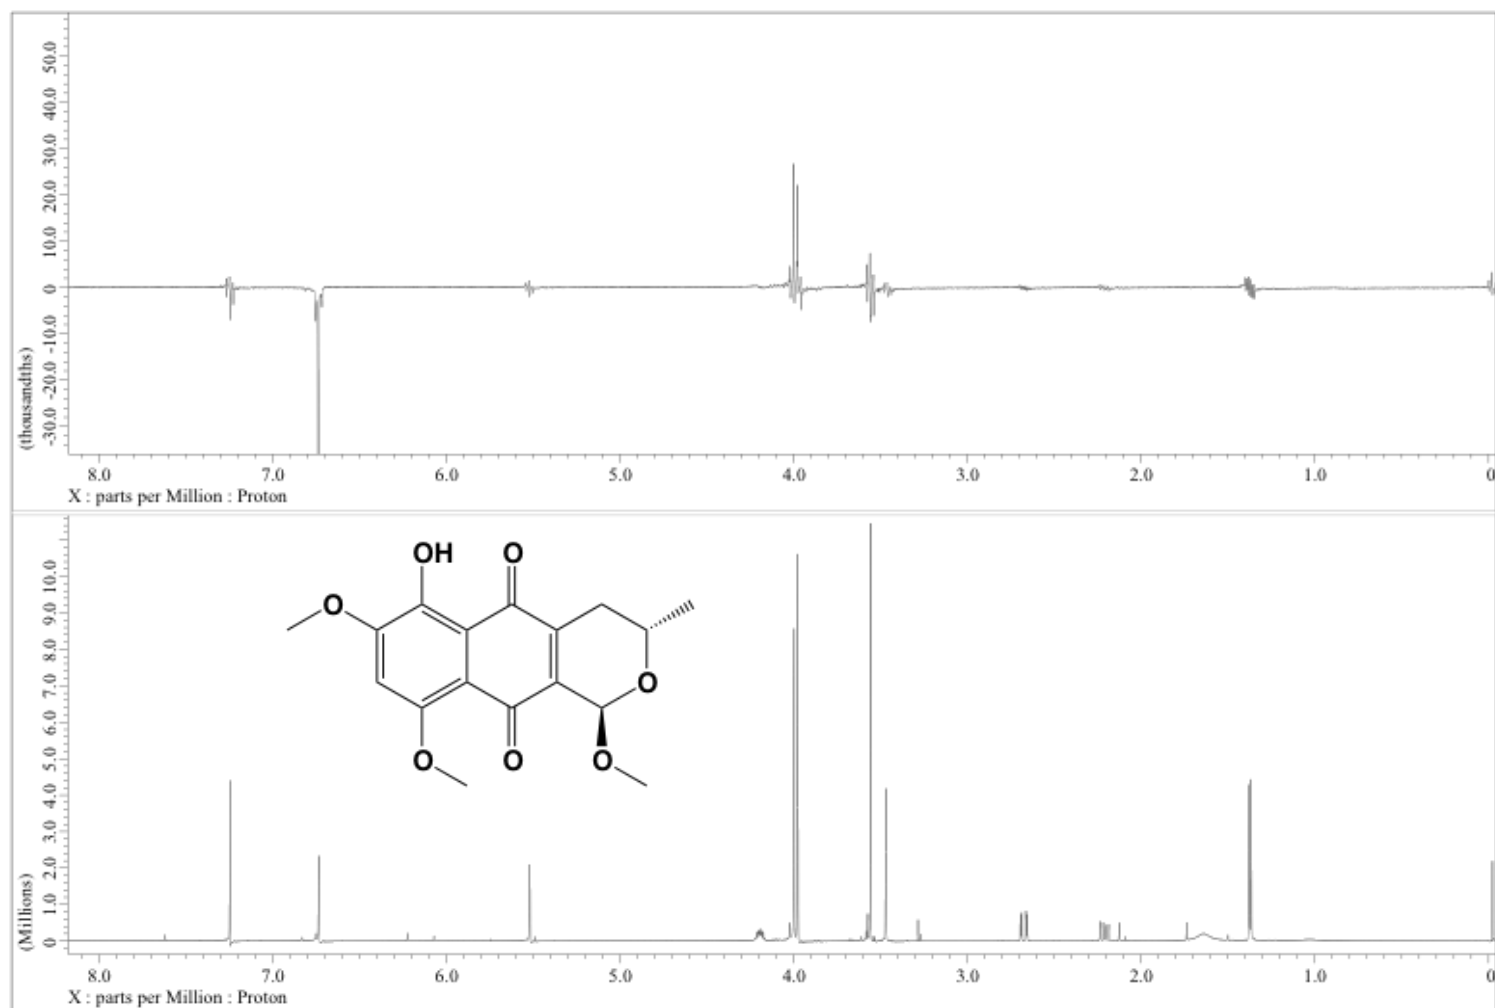

**Figure S8.** The NOE spectrum of **1** (600 MHz, CDCl<sub>3</sub>).

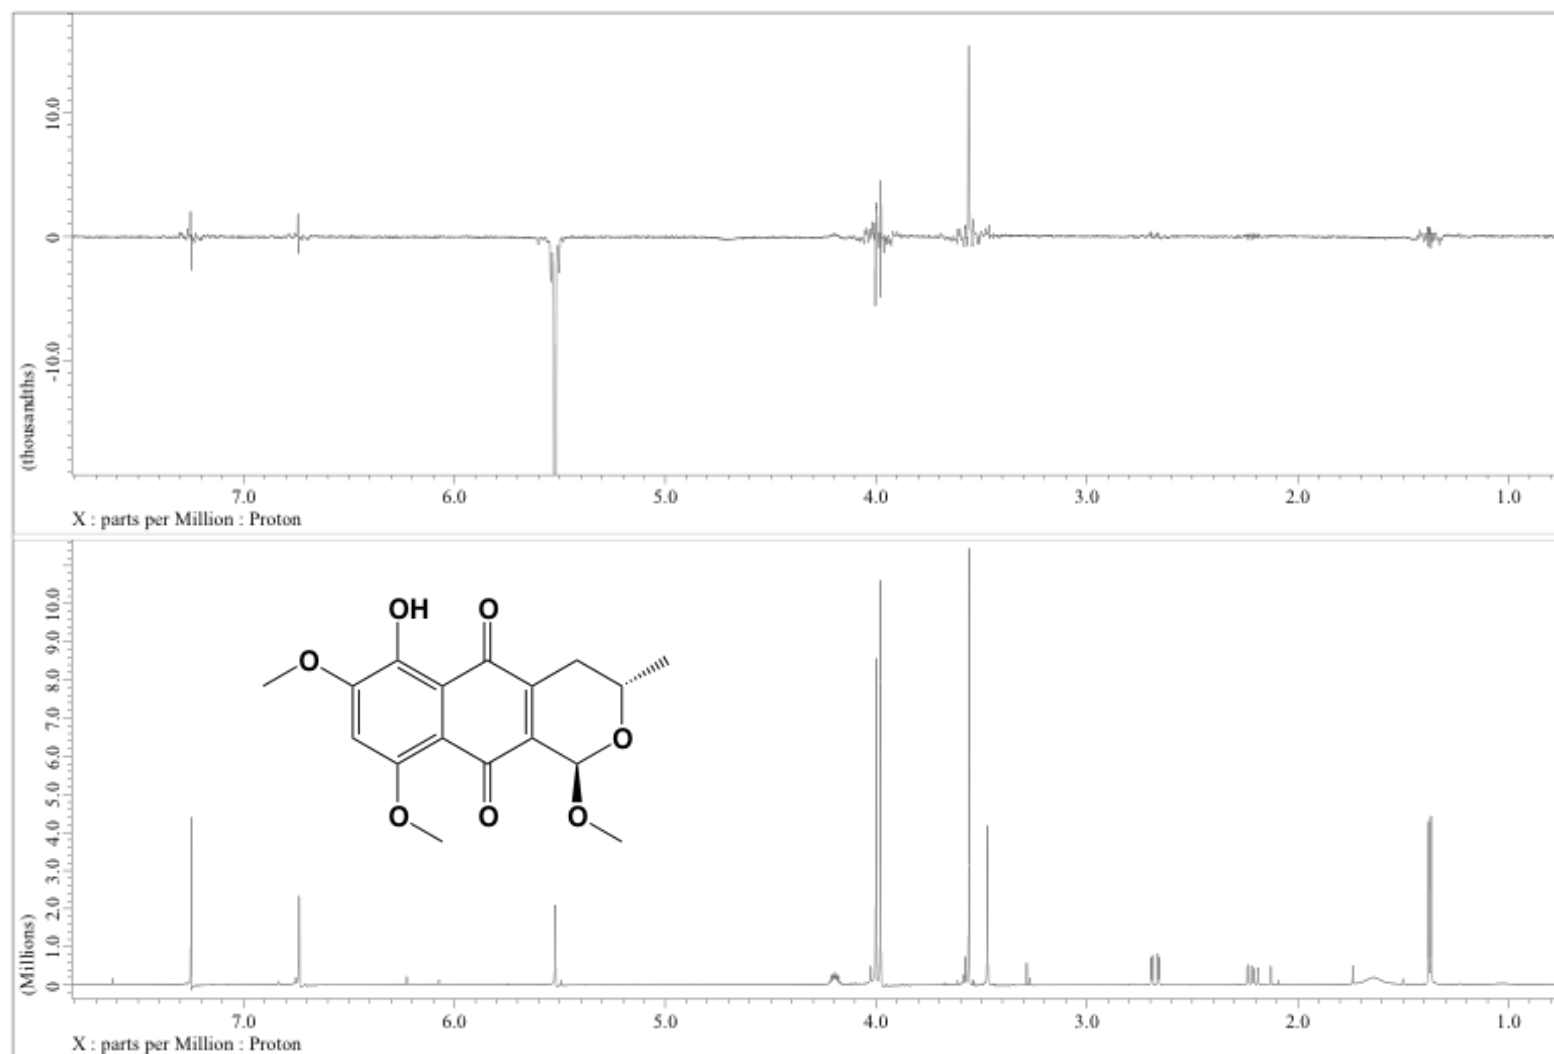

**Figure S9.** The NOE spectrum of **1** (600 MHz, CDCl<sub>3</sub>).

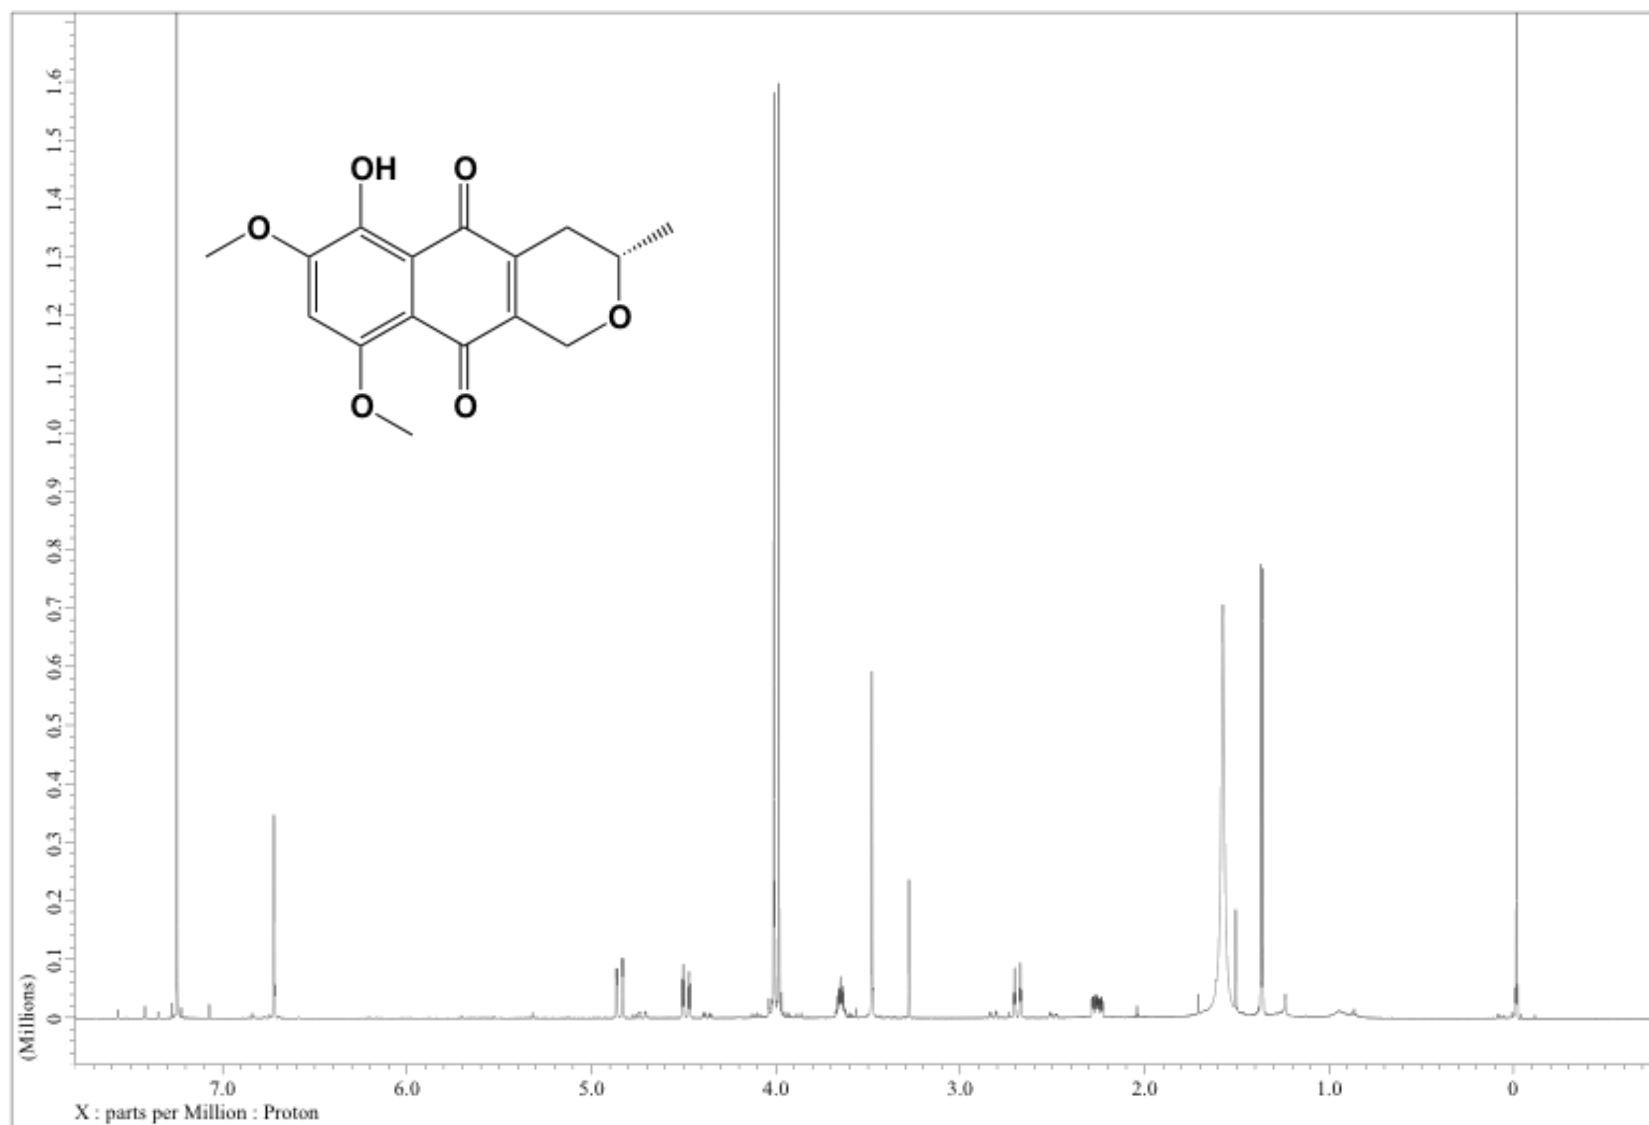

**Figure S10.** The  $^1\text{H-NMR}$  spectrum of **2** (600 MHz,  $\text{CD}_3\text{OD}$ ).

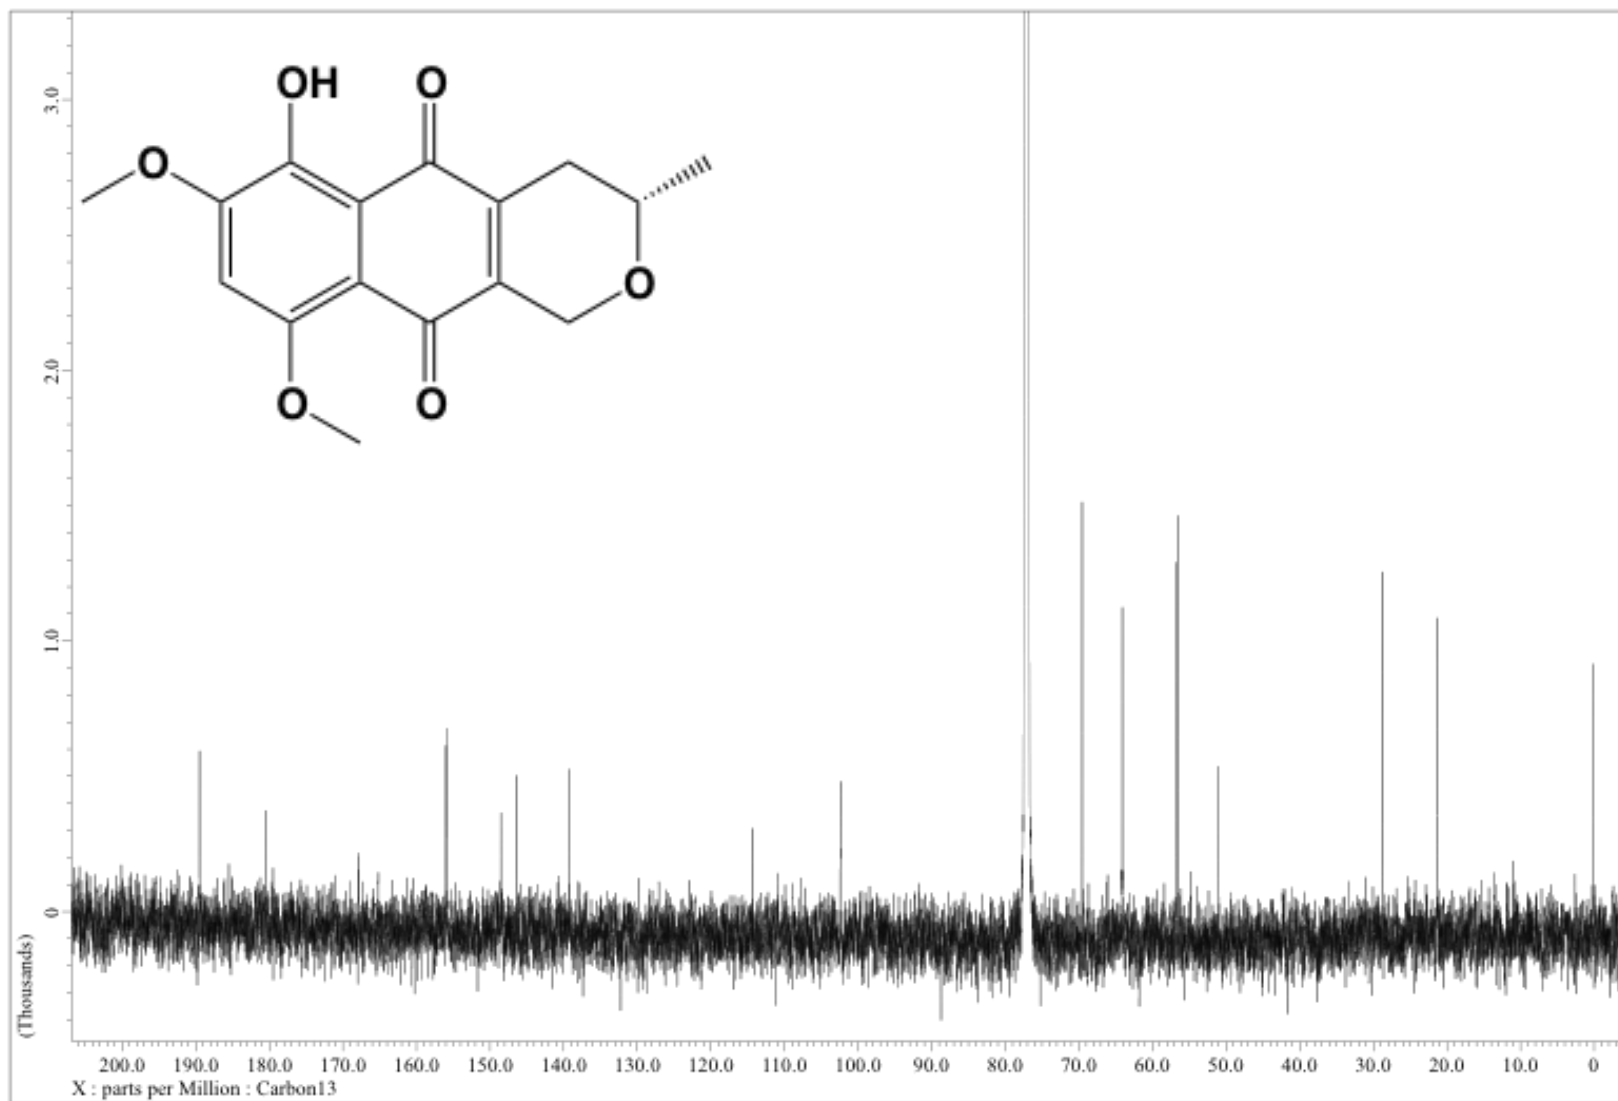

**Figure S11.** The  $^{13}\text{C}$ -NMR spectrum of **2** (150 MHz,  $\text{CD}_3\text{OD}$ ).

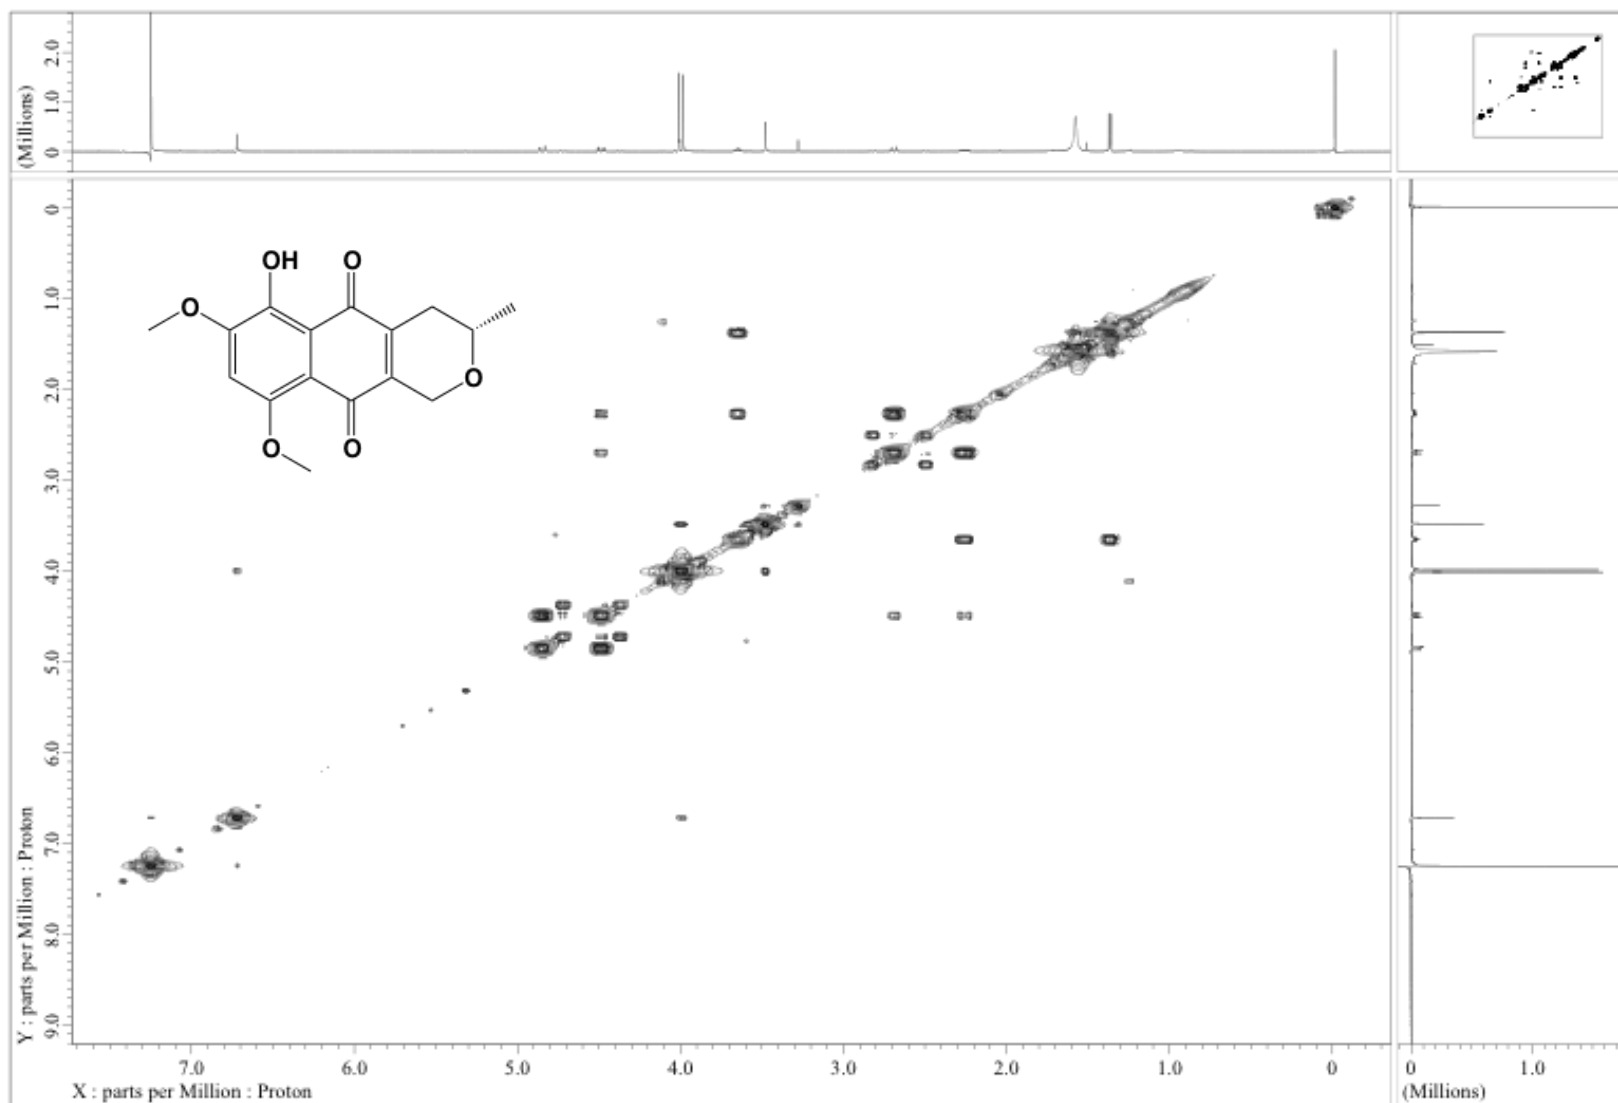

**Figure S12.** The  $^1\text{H}$ - $^1\text{H}$  COSY spectrum of **2** (600 MHz,  $\text{CDCl}_3$ ).

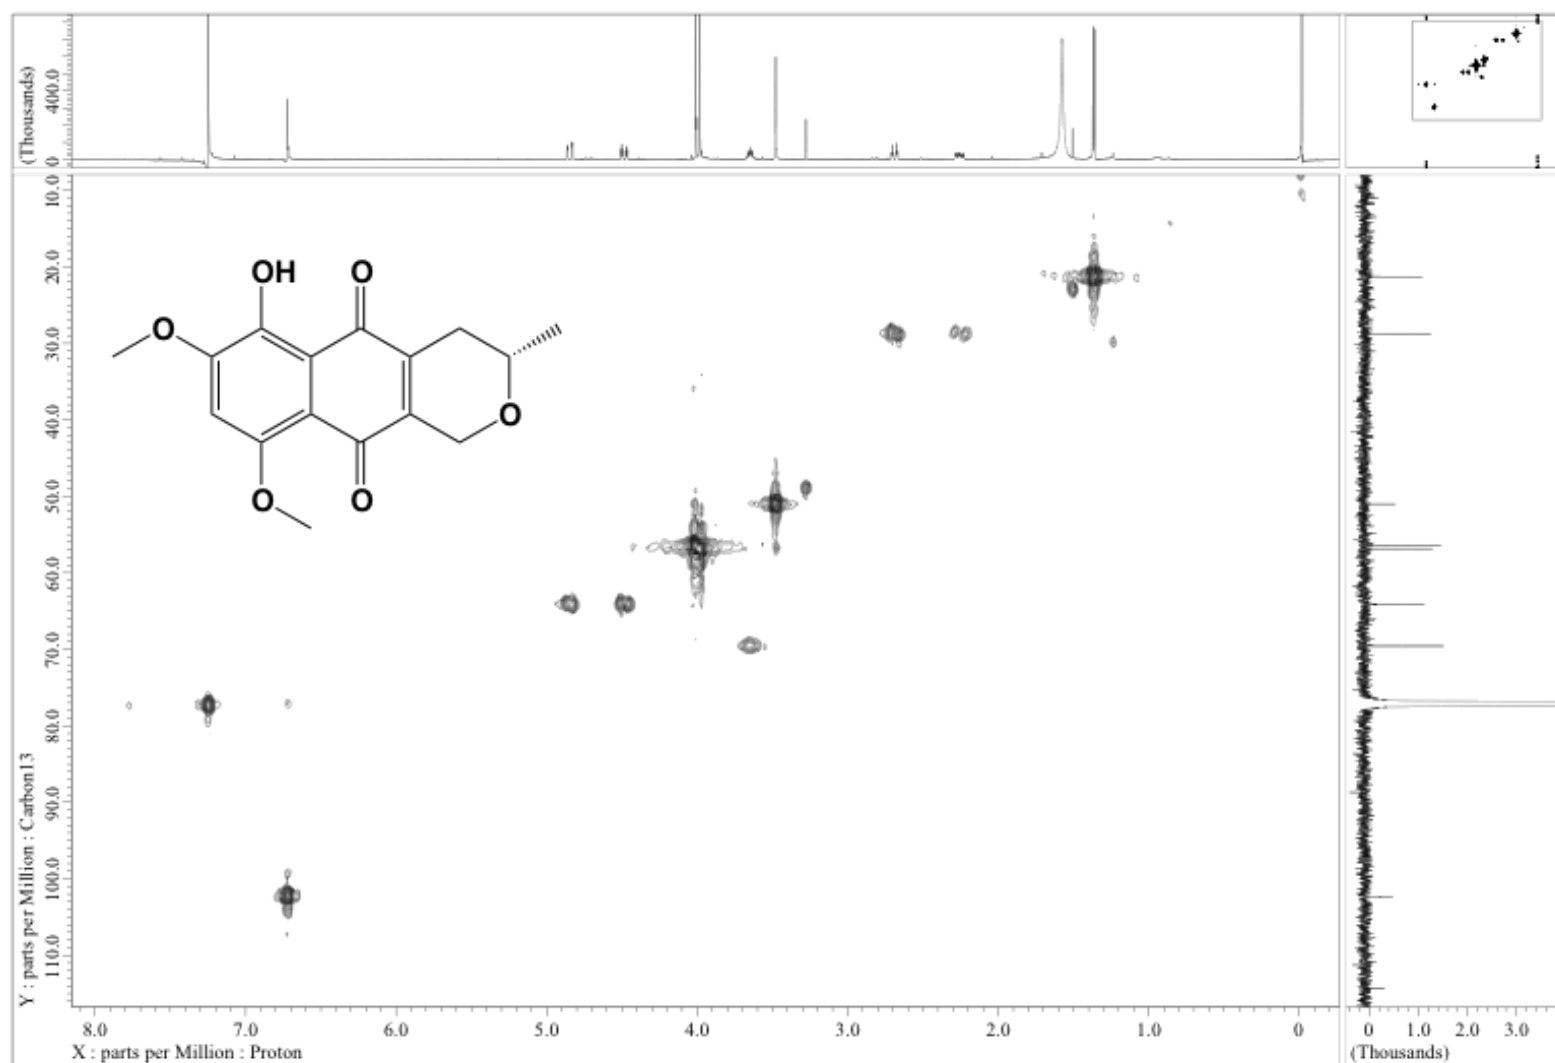

**Figure S13.** The HMQC spectrum of **2** (600 MHz, CD<sub>3</sub>OD).



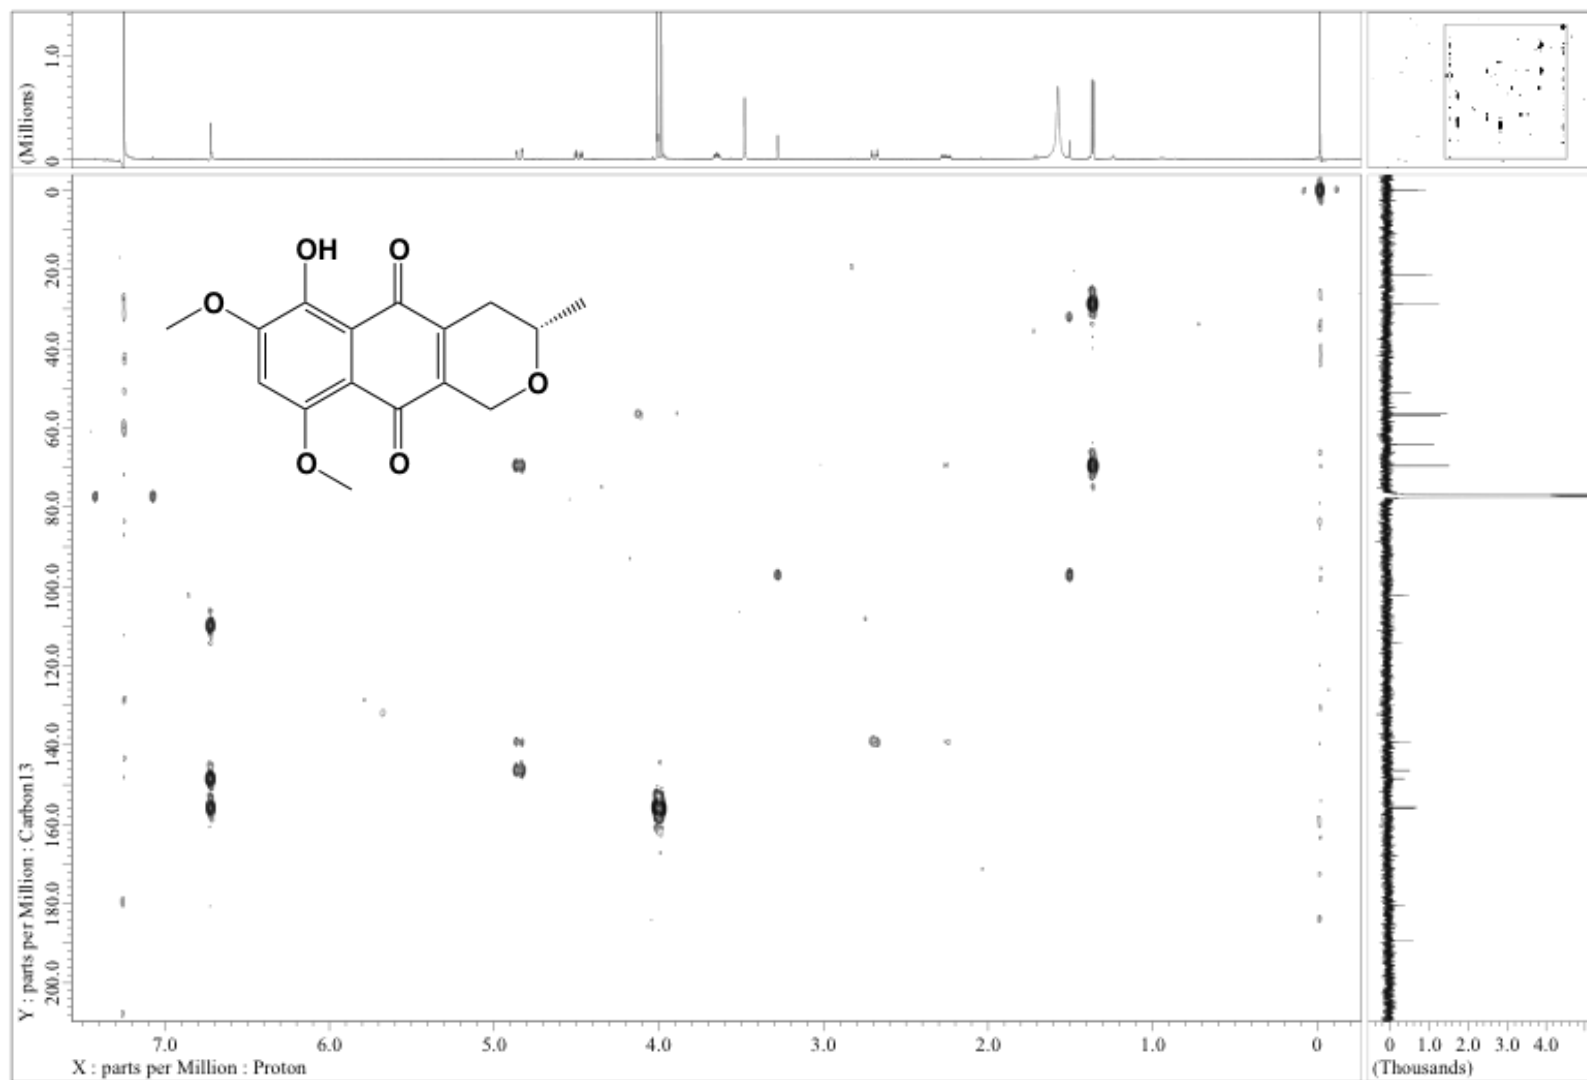

Figure S14. The HMBC spectrum of **2** (600 MHz, CD<sub>3</sub>OD).

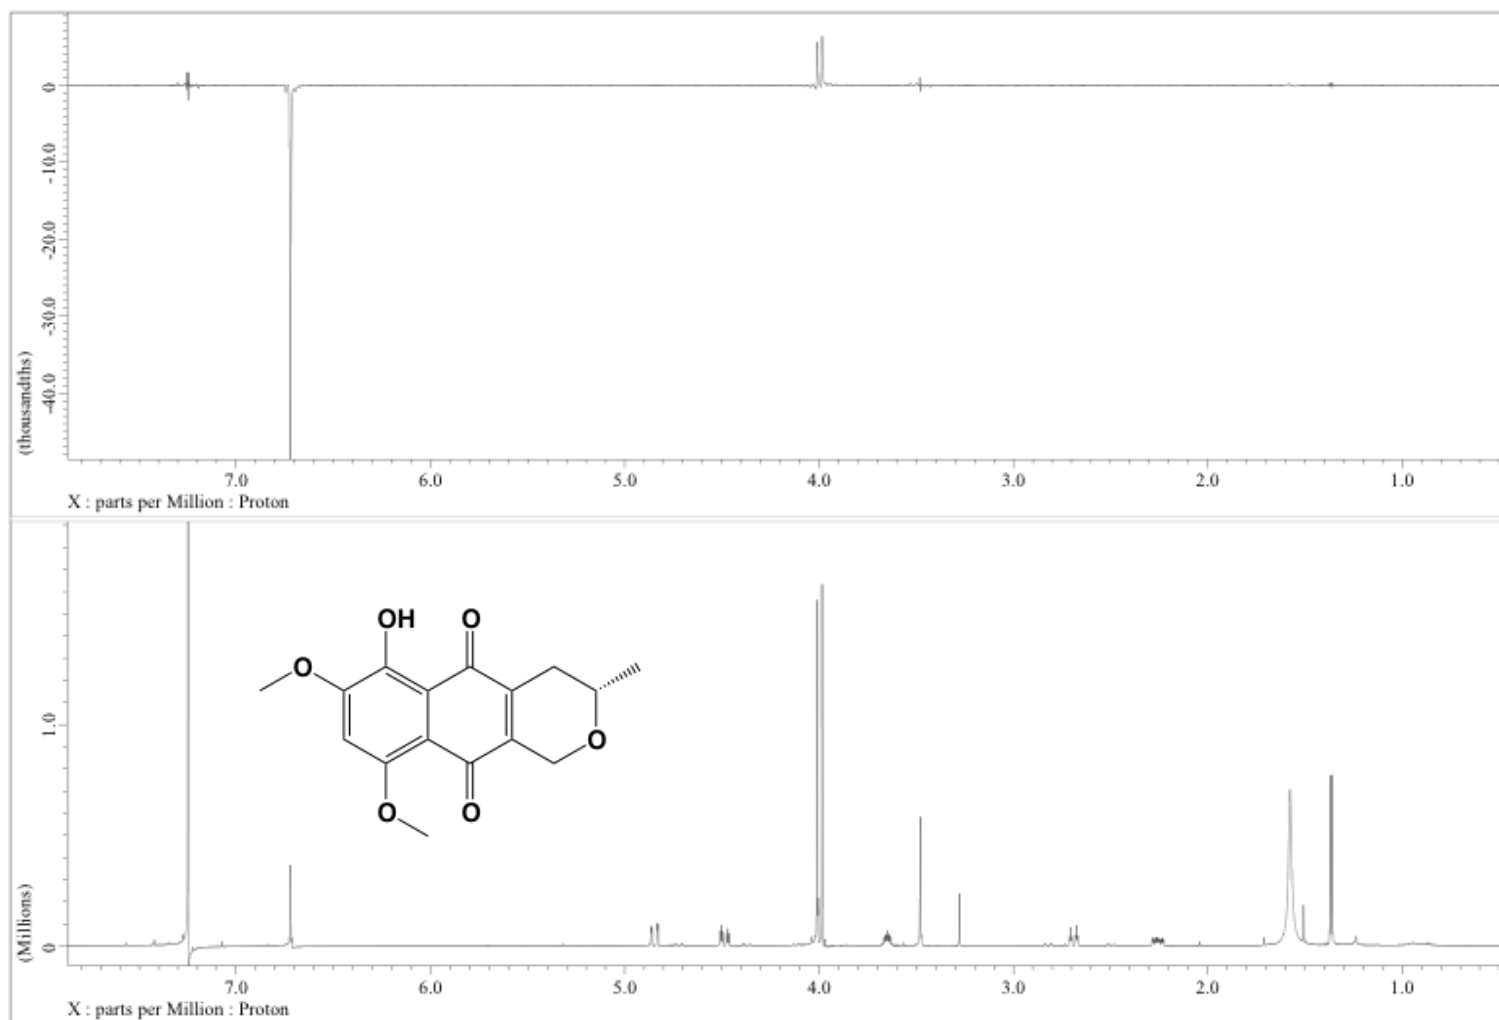

**Figure S15.** The NOE spectrum of **1** (600 MHz, CDCl<sub>3</sub>).

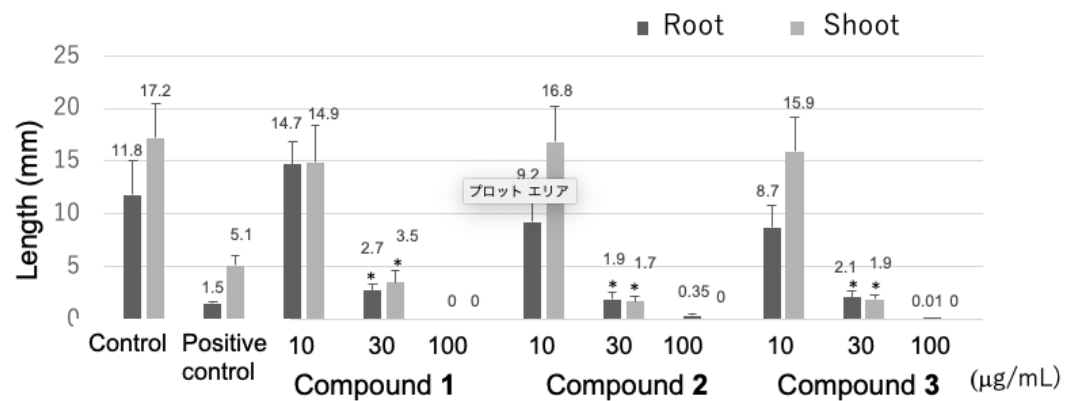

Results are the mean  $\pm$  standard deviation (n=15). [ \*p < 0.01 (growth inhibition) versus control] and positive control: 2,4-dichlorophenoxyacetic acid (0.3  $\mu$ g/mL).

**Figure S.16.** Effect of compounds 1, 2 and 3 on the Growth of Lettuce Seedlings.
